# Supplementary material
Source: publisher figshare collection journal article supplement (https://acs.figshare.com/ndownloader/files/8220761)
Supplement: Supplementary file 1 [file 8220761]

**Enhanced Lattice Oxygen Reactivity Over Ni  
Modified WO<sub>3</sub>-Based Redox Catalysts for Chemical  
Looping Partial Oxidation of Methane**

Sai Chen, Liang Zeng, Hao Tian, Xinyu Li, and Jinlong Gong\*

*Key Laboratory for Green Chemical Technology of Ministry of Education, School of  
Chemical Engineering and Technology; Collaborative Innovation Center of Chemical  
Science and Engineering, Tianjin University, Tianjin 300072, China.*

\* Corresponding author. Fax: +86-22-87401818; Email address: jlgong@tju.edu.cn.

## Table of Contents

1. XRD derived characteristics of various oxygen carriers.
2. Data derived from ICP-OES for the fresh samples
3. Data derived from XPS of  $\text{Ni}_{0.5}\text{W}_1\text{O}_x/\text{Al}_2\text{O}_3$  after one and ten cycles
4. Molar fractions of CO, CO<sub>2</sub>, and H<sub>2</sub> on  $\text{Ni}_{0.5}\text{W}_1\text{O}_x/\text{Al}_2\text{O}_3$  during 10 redox cycles
5. XRD patterns of fresh and reduced  $\text{Ni}_{0.5}\text{W}_1\text{O}_x/\text{Al}_2\text{O}_3$  and  $\text{NiO}/\text{Al}_2\text{O}_3$
6. XPS spectra of  $\text{Ni}_{0.5}\text{W}_1\text{O}_x/\text{Al}_2\text{O}_3$  after one and ten cycles, EDS line scan of  $\text{Ni}_{0.5}\text{W}_1\text{O}_x/\text{Al}_2\text{O}_3$  after one cycle.
7. Molar fractions of CO, CO<sub>2</sub> and O<sub>2</sub> from oxygen oxidation of WO<sub>3</sub>, WO<sub>3</sub>/Al<sub>2</sub>O<sub>3</sub>,  $\text{Ni}_{0.3}\text{W}_1\text{O}_x/\text{Al}_2\text{O}_3$ ,  $\text{Ni}_{0.5}\text{W}_1\text{O}_x/\text{Al}_2\text{O}_3$ ,  $\text{Ni}_1\text{W}_1\text{O}_x/\text{Al}_2\text{O}_3$  and  $\text{NiO}/\text{Al}_2\text{O}_3$  at 800 °C in the first cycle.
8. UV–vis reflectance spectra of fresh WO<sub>3</sub>/Al<sub>2</sub>O<sub>3</sub> and  $\text{Ni}_{0.5}\text{W}_1\text{O}_x/\text{Al}_2\text{O}_3$ .

**Table S1** XRD derived characteristics of various oxygen carriers.

| Oxygen Carriers              | Crystal Phase/Size | WO <sub>3</sub>                                           | WO <sub>3</sub> /Al <sub>2</sub> O <sub>3</sub>                                  | Ni <sub>0.3</sub> W <sub>1</sub> O <sub>x</sub> /Al <sub>2</sub> O <sub>3</sub>                                          | Ni <sub>0.5</sub> W <sub>1</sub> O <sub>x</sub> /Al <sub>2</sub> O <sub>3</sub> | Ni <sub>1</sub> W <sub>1</sub> O <sub>x</sub> /Al <sub>2</sub> O <sub>3</sub> | NiO/Al <sub>2</sub> O <sub>3</sub> |
|------------------------------|--------------------|-----------------------------------------------------------|----------------------------------------------------------------------------------|--------------------------------------------------------------------------------------------------------------------------|---------------------------------------------------------------------------------|-------------------------------------------------------------------------------|------------------------------------|
| Fresh                        | Phase              | WO <sub>3</sub>                                           | Al <sub>2</sub> (WO <sub>4</sub> ) <sub>3</sub> , Al <sub>2</sub> O <sub>3</sub> | WO <sub>3</sub> , Al <sub>2</sub> (WO <sub>4</sub> ) <sub>3</sub> , NiWAlO <sub>x</sub> , Al <sub>2</sub> O <sub>3</sub> | WO <sub>3</sub> , Al <sub>2</sub> O <sub>3</sub>                                | NiWO <sub>4</sub>                                                             | —                                  |
|                              | Size (nm)          | >100 <sup>a</sup>                                         | 54 <sup>b</sup>                                                                  | 43 <sup>a</sup>                                                                                                          | 32 <sup>a</sup>                                                                 | 60 <sup>c</sup>                                                               | —                                  |
| after reduction              | Phase              | WO <sub>2.96</sub> , WO <sub>2.72</sub> , WO <sub>2</sub> | WO <sub>2</sub> , Al <sub>2</sub> O <sub>3</sub> , WO <sub>2.72</sub>            | WO <sub>2</sub> , W, WC, Ni, Al <sub>2</sub> O <sub>3</sub>                                                              | WO <sub>2</sub> , W, Ni, Al <sub>2</sub> O <sub>3</sub>                         | WC, Ni, Al <sub>2</sub> O <sub>3</sub>                                        | Ni, Al <sub>2</sub> O <sub>3</sub> |
|                              | Size (nm)          | —                                                         | —                                                                                | 12 <sup>d</sup> , 15 <sup>e</sup>                                                                                        | 9 <sup>d</sup> , 13 <sup>e</sup>                                                | 14 <sup>d</sup> , 20 <sup>f</sup>                                             | 16 <sup>d</sup> , —                |
| after 1 <sup>st</sup> cycle  | Phase              | WO <sub>3</sub>                                           | Al <sub>2</sub> (WO <sub>4</sub> ) <sub>3</sub> , Al <sub>2</sub> O <sub>3</sub> | WO <sub>3</sub> , NiWO <sub>4</sub> , Al <sub>2</sub> O <sub>3</sub>                                                     | WO <sub>3</sub> , NiWO <sub>4</sub> , Al <sub>2</sub> O <sub>3</sub>            | NiWO <sub>4</sub> , Al <sub>2</sub> O <sub>3</sub>                            | —                                  |
|                              | Size (nm)          | >100 <sup>a</sup>                                         | 60 <sup>b</sup>                                                                  | 45 <sup>a</sup>                                                                                                          | 35 <sup>a</sup>                                                                 | 63 <sup>c</sup>                                                               | —                                  |
| after 10 <sup>th</sup> cycle | Phase              | —                                                         | —                                                                                | —                                                                                                                        | WO <sub>3</sub> , NiWO <sub>4</sub> , Al <sub>2</sub> O <sub>3</sub>            | —                                                                             | —                                  |
|                              | Size (nm)          | —                                                         | —                                                                                | —                                                                                                                        | 40 <sup>a</sup>                                                                 | —                                                                             | —                                  |

<sup>a</sup> Determined by the Scherrer equation from the (001) plane of WO<sub>3</sub>, <sup>b</sup> Determined by the Scherrer equation from the (031) plane of

Al<sub>2</sub>(WO<sub>4</sub>)<sub>3</sub> and <sup>c</sup> Determined by the Scherrer equation from the (-111) plane of NiWO<sub>4</sub> in XRD patterns.

<sup>d</sup> Determined by the Scherrer equation from the (111) plane of Ni, <sup>e</sup> Determined by the Scherrer equation from the (210) plane of W and <sup>f</sup>

Determined by the Scherrer equation from the (100) plane of WC in XRD patterns.

**Table S2** Data derived from ICP-OES for the fresh samples.

| Samples | WO <sub>3</sub> /Al <sub>2</sub> O <sub>3</sub> | Ni <sub>0.3</sub> W <sub>1</sub> O <sub>x</sub> /Al <sub>2</sub> O <sub>3</sub> | Ni <sub>0.5</sub> W <sub>1</sub> O <sub>x</sub> /Al <sub>2</sub> O <sub>3</sub> | Ni <sub>1</sub> W <sub>1</sub> O <sub>x</sub> /Al <sub>2</sub> O <sub>3</sub> |
|---------|-------------------------------------------------|---------------------------------------------------------------------------------|---------------------------------------------------------------------------------|-------------------------------------------------------------------------------|
| Ni/W    | 0                                               | 0.29                                                                            | 0.52                                                                            | 1.1                                                                           |

**Table S3** Data derived from XPS of  $\text{Ni}_{0.5}\text{W}_1\text{O}_x/\text{Al}_2\text{O}_3$  after one and ten cycles.

| Oxygen Carriers        | OI/(OII+OIII) | $\text{W}^{6+}/\text{W}^{5+}$ | Ni/W |
|------------------------|---------------|-------------------------------|------|
| 1 <sup>st</sup> cycle  | 2.2           | 5.8                           | 0.26 |
| 10 <sup>th</sup> cycle | 4.2           | 2.9                           | 0.18 |

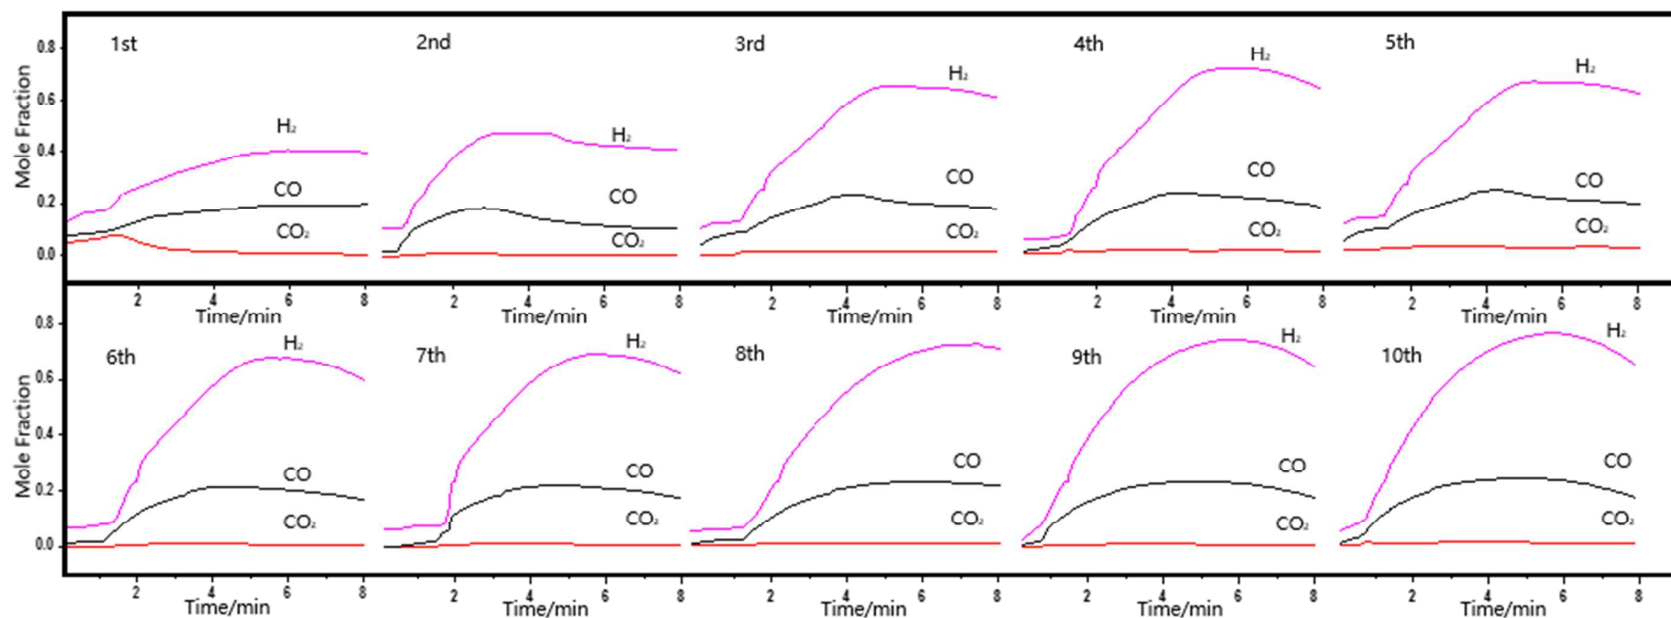

**Figure S1.** Molar fractions of CO, CO<sub>2</sub>, and H<sub>2</sub> from reduction on Ni<sub>0.5</sub>W<sub>1</sub>O<sub>x</sub>/Al<sub>2</sub>O<sub>3</sub> during 10 redox cycles (The purple, black and red lines respectively represent H<sub>2</sub>, CO and CO<sub>2</sub>).

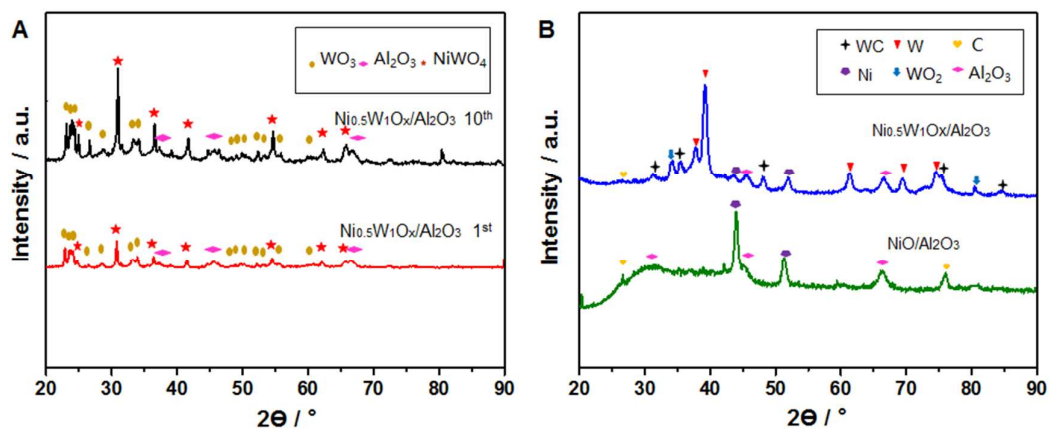

**Figure S2.** XRD patterns of (A)  $\text{Ni}_{0.5}\text{W}_1\text{O}_x/\text{Al}_2\text{O}_3$  after the first and tenth cycle, (B)  $\text{Ni}_{0.5}\text{W}_1\text{O}_x/\text{Al}_2\text{O}_3$  and  $\text{NiO}/\text{Al}_2\text{O}_3$  after reduction in the first cycle.

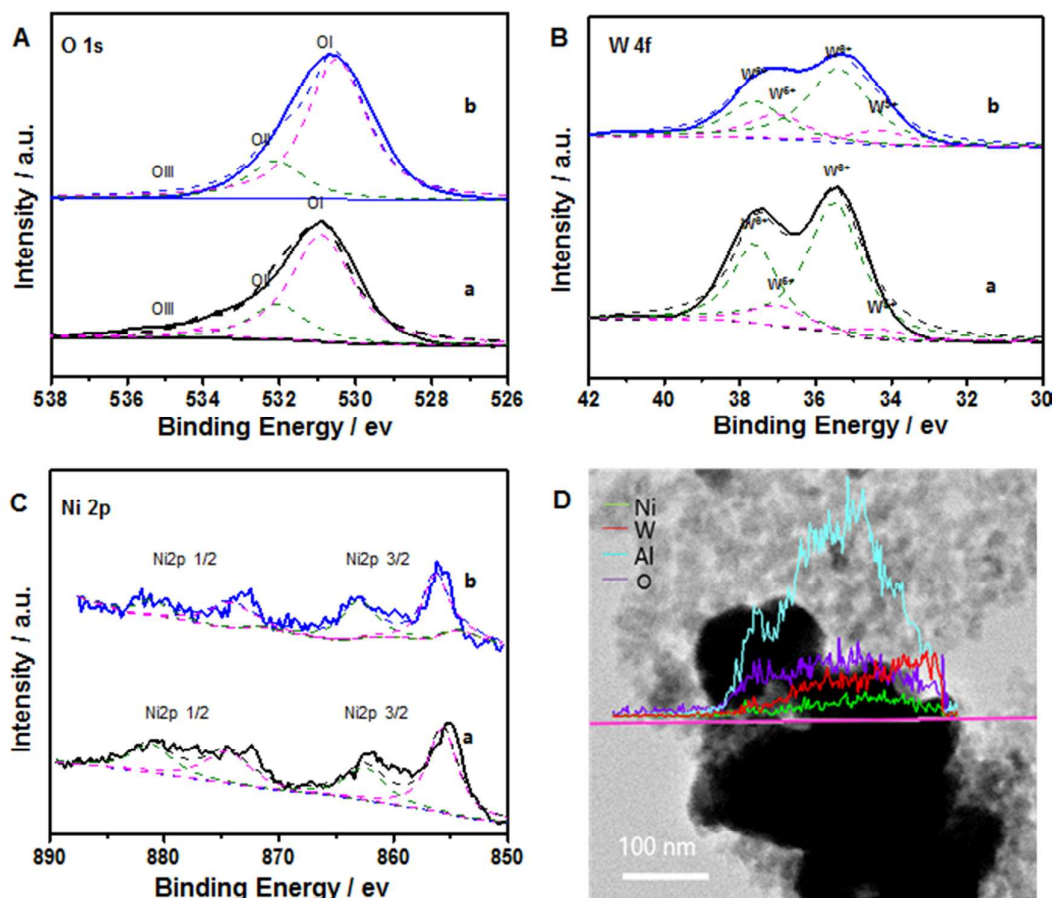

**Figure S3.** (A) O 1s, (B) W 4f and (C) Ni 2p XPS spectra of  $\text{Ni}_{0.5}\text{W}_1\text{O}_x/\text{Al}_2\text{O}_3$  after (a) one and (b) ten cycles, (D) EDS line scan of  $\text{Ni}_{0.5}\text{W}_1\text{O}_x/\text{Al}_2\text{O}_3$  after one cycle.

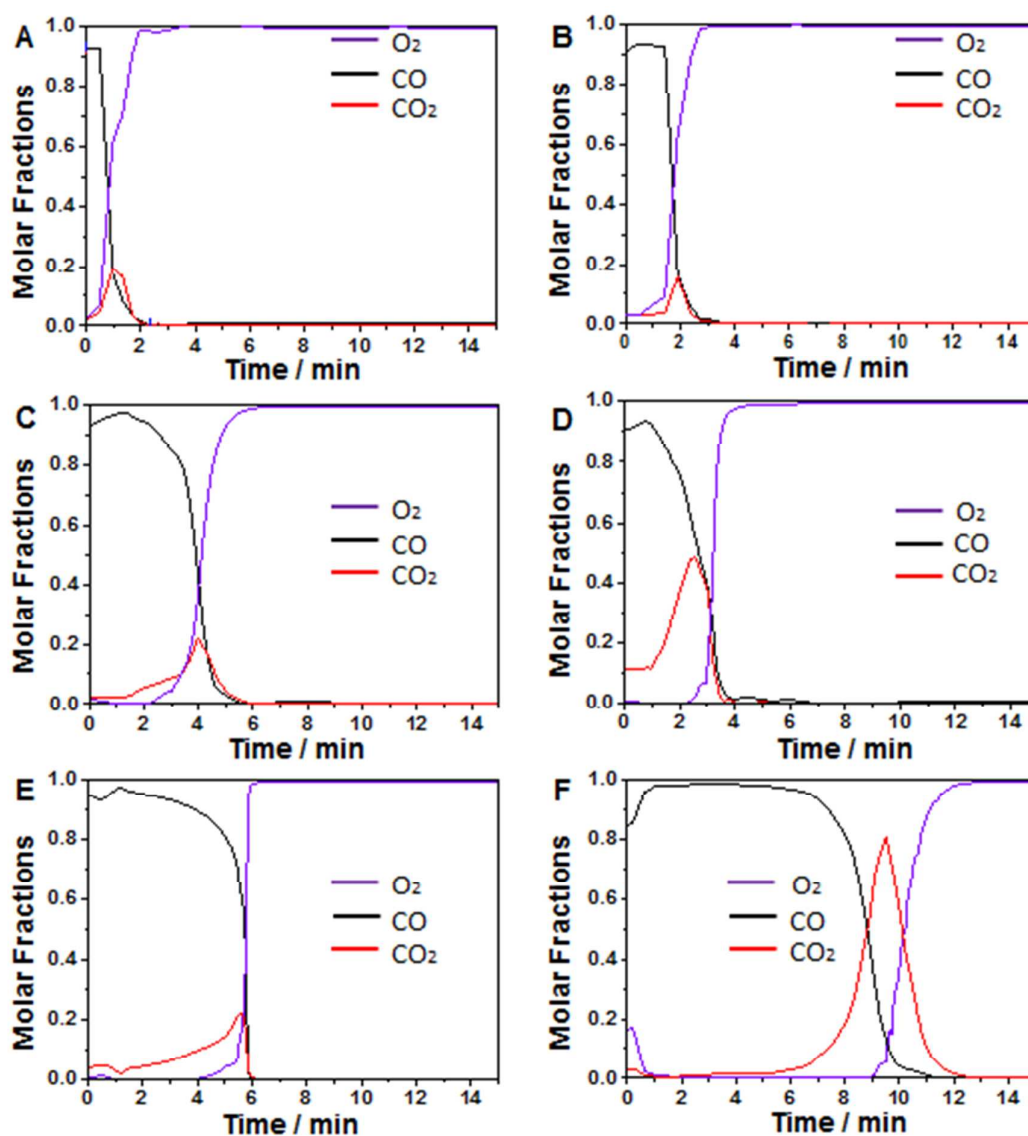

**Figure S4.** Molar fractions of CO, CO<sub>2</sub> and O<sub>2</sub> from oxygen oxidation of (A) WO<sub>3</sub>, (B) WO<sub>3</sub>/Al<sub>2</sub>O<sub>3</sub>, (C) Ni<sub>0.3</sub>W<sub>1</sub>O<sub>x</sub>/Al<sub>2</sub>O<sub>3</sub>, (D) Ni<sub>0.5</sub>W<sub>1</sub>O<sub>x</sub>/Al<sub>2</sub>O<sub>3</sub>, (E) Ni<sub>1</sub>W<sub>1</sub>O<sub>x</sub>/Al<sub>2</sub>O<sub>3</sub> and (F) NiO/Al<sub>2</sub>O<sub>3</sub> at 800 °C in the first cycle.

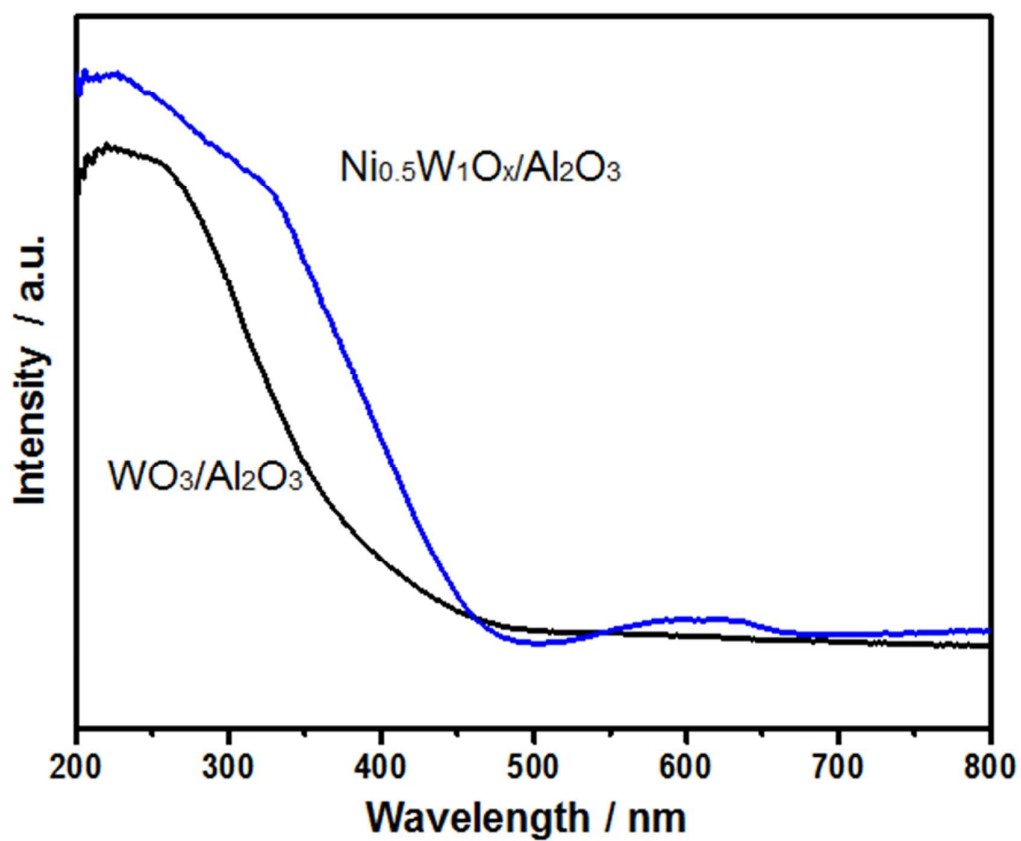

**Figure S5.** UV–Vis reflectance spectra of fresh  $\text{WO}_3/\text{Al}_2\text{O}_3$  and  $\text{Ni}_{0.5}\text{W}_1\text{O}_x/\text{Al}_2\text{O}_3$ .
